# Supplementary material for: Super-resolution microscopy reveals the insulin-resistance-regulated reorganization of GLUT4 on plasma membranes
Source: Oxford University Press journal article supplement (doi:10.1242/jcs.192450), 2016-11-26
Supplement: jcs192450supp.pdf [file jcs192450supp.pdf]

## Supporting Information

### Super-resolution microscopy reveals the reorganization of GLUT4 on plasma membrane regulated by insulin resistance

Lan Gao<sup>1,2</sup>, Junling Chen<sup>2,3</sup>, Jing Gao<sup>2,3</sup>, Hongda Wang<sup>3,\*</sup> & Wenyong Xiong<sup>1,\*</sup>

<sup>1</sup> State Key Laboratory of Phytochemistry and Plant Resources in West China, Kunming Institute of Botany, Chinese Academy of Sciences, Kunming, YN 650201, P.R. China

<sup>2</sup> Graduate University of Chinese Academy of Sciences, Beijing 100049, P.R. China

<sup>3</sup> State Key Laboratory of Electroanalytical Chemistry, Changchun Institute of Applied Chemistry, Chinese Academy of Sciences, Changchun, JL 130022, P.R. China

#### \* Author for correspondence:

Prof. Wenyong Xiong, Ph.D.

Kunming Institute of Botany, Chinese Academy of Sciences

132 Lanhei Road, Kunming, Yunnan 650201, China

Tel: 0086-871-65216939, Fax: 0086-871-65216750

Email: xiong.wenyong@mail.kib.ac.cn

Or

Prof. Hongda Wang, Ph.D.

Changchun Institute of Applied Chemistry, Chinese Academy of Sciences

5625 Renmin Rd., Changchun, Jilin 130022, China

Tel: 0086-0431-85262684, Fax: 0086-85262864

Email: hdwang@ciac.ac.cn

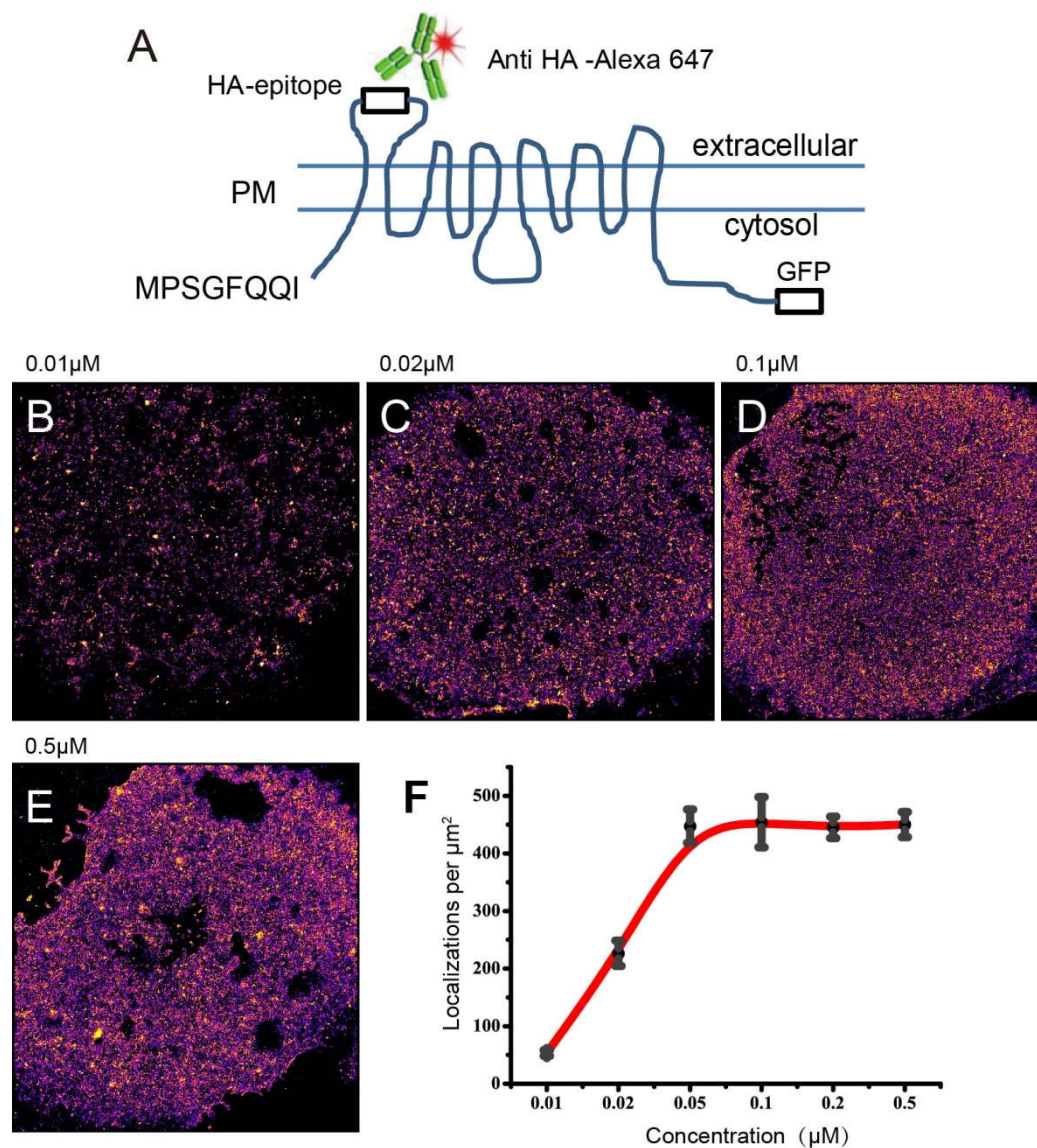

Figure S1. A. Structural diagram of the HA-GLUT4-GFP protein. The F<sup>5</sup>QQI motif is indicated, and the positions of the HA-epitope tag and GFP are shown. B-E. dSTORM images GLUT4 on the PM of insulin-stimulated adipocytes treated with different concentrations of anti-HA 1.1-Alexa Fluor 647 (0.01- 0.5  $\mu$ M). F. Localization density of GLUT4 on the PM of insulin-stimulated adipocytes treated with different concentrations of anti-HA 1.1-Alexa Fluor 647 (0.01- 0.5  $\mu$ M); at an anti-HA 1.1-Alexa Fluor 647 concentration of about 0.05  $\mu$ M, the number of localizations per unit of cell membrane area, as determined by dSTORM, was saturated.

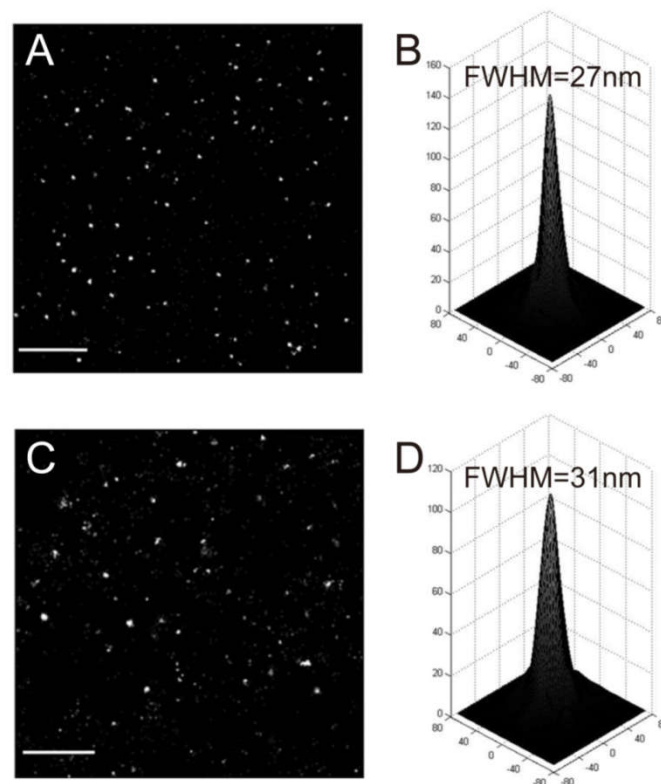

Figure S2. Measurement of the localization precision of a single Alexa Fluor 647-conjugated anti-HA.11 monoclonal antibody (mAb) molecule on a coverslip or the cell surface. (A) Typical dSTORM image of Alexa Fluor 647-conjugated anti-HA.11 mAbs at an appropriate concentration ( $\sim 7$  nM) on a clean coverslip. Each spot in the image represents a cluster of localizations from a single Alexa Fluor 647-conjugated antibody molecule. (B) Two-dimensional histograms of the localizations were generated by aligning 50 single antibody molecules, and the localization precision of 27 nm was determined by measuring the full-width at half-maximum (FWHM). (C, D) The localization precision of a single Alexa Fluor 647-conjugated anti-HA.11 mAb molecule on the 3T3-L1 adipocyte membrane. The FWHM was 31 nm. Scale bar: 2  $\mu$ m.

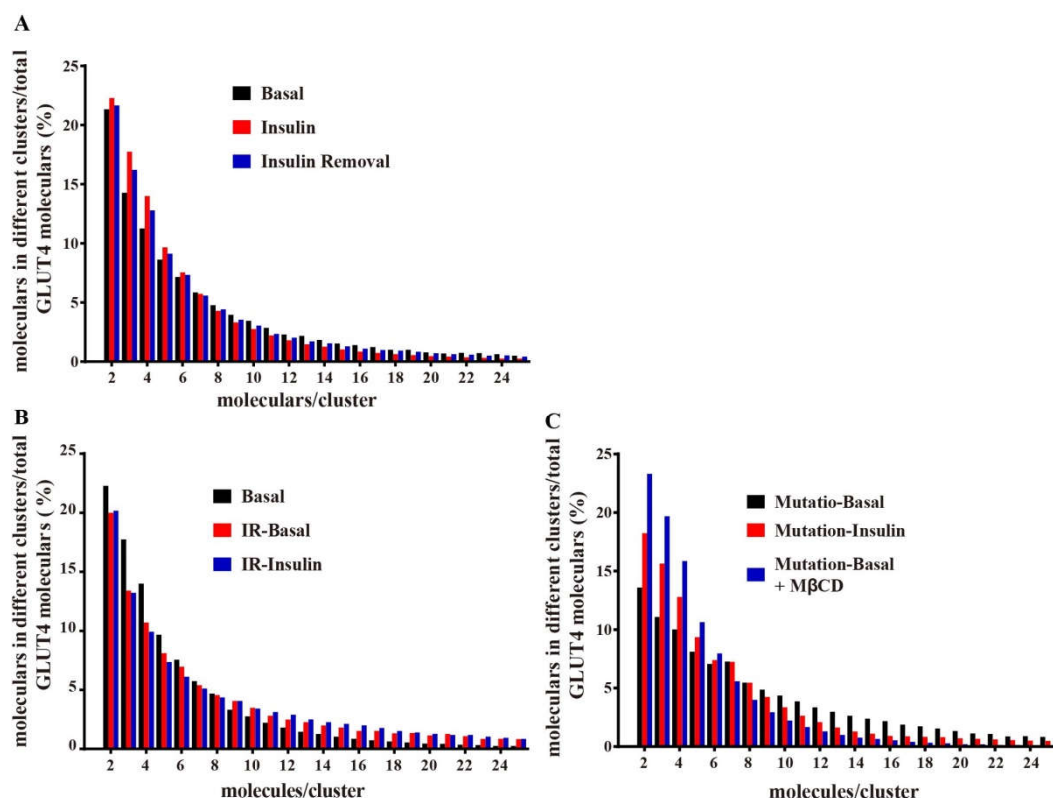

Figure S3. The entire GLUT4 molecules distribution of different sizes of clusters in all conditions studied: (A) wide-type GLUT4 on the PM of normal cells; (B) wide-type GLUT4 on the PM of insulin-resistant cells; (C) F<sup>5</sup>QQL-GLUT4 on the PM of normal cells.

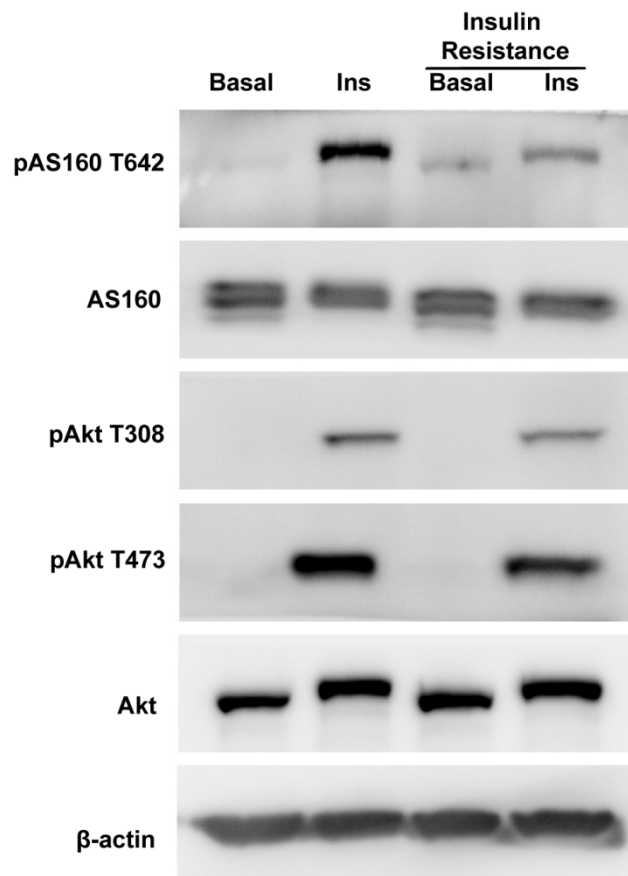

Figure S4. Representative western blot of screened proteins involved in the insulin signaling pathway in insulin-resistant adipocytes. Insulin signaling was monitored by measuring phosphorylation of Akt at Thr-308 and Ser-473 and AS160 at Thr-642 in response to 100 nM insulin. Total levels of Akt and AS160 were assessed in all conditions, and β-actin was used as a control.

Table S1. Compare of corresponding data in Figure 1 and Figure 3.

|                                       | Wildtype GLUT4 |                | GLUT4 (F <sup>QQA</sup> ) |                |
|---------------------------------------|----------------|----------------|---------------------------|----------------|
|                                       | Normal-Basal   | Normal-Insulin | Normal-Basal              | Normal-Insulin |
| Molecules Density                     | 90 ± 41        | 229 ± 48       | 184 ± 37                  | 363 ± 123      |
| Clusters Density                      | 31.4 ± 13.2    | 79.6 ± 12.7    | 49.8 ± 11.0               | 108.9 ± 33.4   |
| Average molecules per cluster         | 2.79 ± 0.39    | 2.87 ± 0.36    | 3.73 ± 0.36               | 3.44 ± 0.33    |
| Molecules in clusters/total molecules | 78% ± 5%       | 66% ± 2%       | 80% ± 4%                  | 63% ± 5%       |
